# Supplementary material for: Charge transfer modulated heterointerfaces for hydrogen production at all pH values
Source: Royal Society of Chemistry journal article supplement (doi:10.1039/d2ta06083c), 2022-01-01
Supplement: d2ta06083c1.pdf [file d2ta06083c1.pdf]

### Supporting Information

#### **Charge Transfer Modulated Heterointerface for Hydrogen Production at All pH**

Mamoni Maji,<sup>1§</sup> Nikalabh Dihingia,<sup>1§</sup> Supriti Dutta,<sup>2</sup> Sahanaz Parvin,<sup>1</sup> Swapan K. Pati,<sup>2</sup> and Sayan Bhattacharyya<sup>1,\*</sup>

<sup>1</sup>*Department of Chemical Sciences, and Centre for Advanced Functional Materials, Indian Institute of Science Education and Research (IISER) Kolkata, Mohanpur - 741246, India*

<sup>2</sup>*Theoretical Sciences Unit, School of Advanced Materials, Jawaharlal Nehru Centre for Advanced Scientific Research (JNCASR), Bangalore 560064, India*

§ Equal contribution

\* Email for correspondence: [sayanb@iiserkol.ac.in](mailto:sayanb@iiserkol.ac.in)

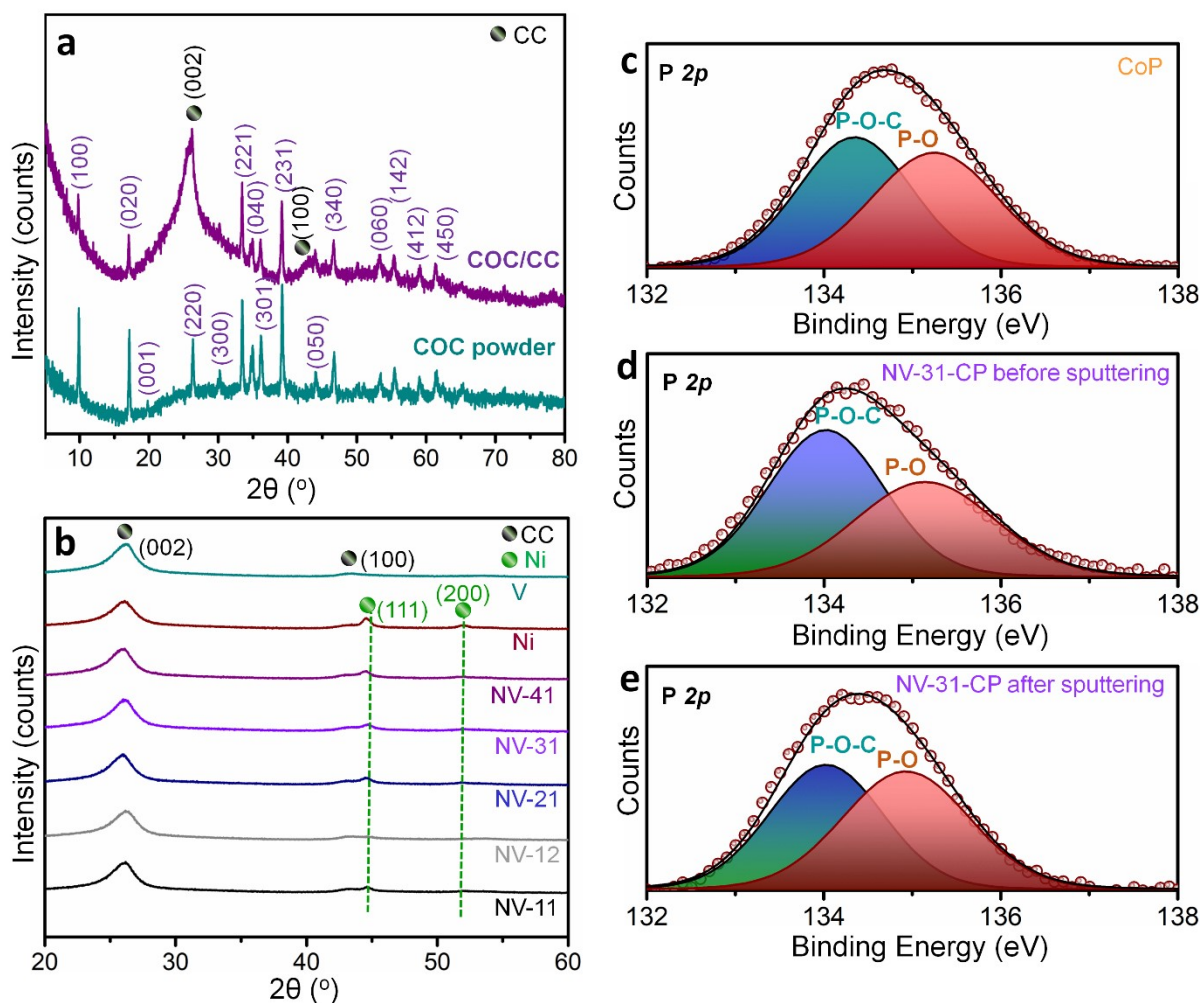

**Figure S1.** XRD patterns of (a)  $\text{Co}(\text{OH})_{1.0}(\text{CO}_3)_{0.5}\cdot x\text{H}_2\text{O}$  (COC) NW powder and COC/CC, and (b) NV-11, NV-12, NV-21, NV-31, NV-41, Ni and V. XPS plots of P 2*p* level for (c) CoP, (d) NV-31-CP (before 20 nm  $\text{Ar}^+$  sputtering) and (e) NV-31-CP (after sputtering).

**Table S1.** ICP-OES stoichiometric data of the electrocatalysts.

| Catalyst | Elemental ratio obtained from ICP-OES |       |       |
|----------|---------------------------------------|-------|-------|
|          | Ni:V                                  | Co:P  | Ni:Co |
| NV-11    | 1.5:1                                 | --    | --    |
| NV-12    | 1.2:2                                 | --    | --    |
| NV-21    | 2.1:1                                 | --    | --    |
| NV-31    | 3.4:1                                 | --    | --    |
| NV-41    | 4.2:1                                 | --    | --    |
| NV-21-CP | 2.1:1                                 | 1:2.2 | 1.4:1 |
| NV-31-CP | 3.4:1                                 | 1:2.3 | 1.5:1 |

|     |    |       |    |
|-----|----|-------|----|
| CoP | -- | 1:2.1 | -- |
|-----|----|-------|----|

**Table S2.** The fitted XPS parameters of the electrocatalysts supported on carbon cloth (CC).

| Catalysts                           | Binding energy (eV) |                  |                        | Relative fractions |                    |                      |                   |                   |
|-------------------------------------|---------------------|------------------|------------------------|--------------------|--------------------|----------------------|-------------------|-------------------|
|                                     | Ni <sup>0</sup>     | Ni <sup>2+</sup> | Ni <sup>3+</sup>       | % Ni <sup>0</sup>  | % Ni <sup>2+</sup> | % Ni <sup>3+</sup>   |                   |                   |
| NV-31/CC                            | 852.8               | 853.7            | 856.0                  | 36.8               | 11.4               | 51.7                 |                   |                   |
| NV-31-CP/CC<br>(before sputtering)  | 853.0               | 853.9            | 856.9                  | 8.0                | 21.8               | 70.1                 |                   |                   |
| NV-31-CP/CC<br>(after sputtering)   | 853.2               | 854.1            | 857.1                  | 11.2               | 21.9               | 66.9                 |                   |                   |
|                                     | Co <sup>2+</sup>    | Co <sup>3+</sup> | Co <sup>δ+</sup> (δ>3) | % Co <sup>2+</sup> | % Co <sup>3+</sup> | % Co <sup>δ+</sup>   |                   |                   |
| CoP/CC                              | 782.3               | 779.6            | 783.9                  | 50.6               | 2.3                | 47.1                 |                   |                   |
| NV-31-CP/CC<br>(before sputtering)  | 781.8               | 779.2            | 783.8                  | 49.7               | 6.6                | 43.7                 |                   |                   |
| NV-31-CP/CC<br>(after sputtering)   | 782.2               | 779.1            | 783.8                  | 64.6               | 1.2                | 34.1                 |                   |                   |
|                                     | Binding energy (eV) |                  |                        |                    | Relative fractions |                      |                   |                   |
|                                     | V <sup>2+</sup>     | V <sup>3+</sup>  | V <sup>4+</sup>        | V <sup>5+</sup>    | % V <sup>2+</sup>  | % V <sup>3+</sup>    | % V <sup>4+</sup> | % V <sup>5+</sup> |
| NV-31/CC                            | 514.1               | 515.2            | 516.4                  | 517.3              | 6.7                | 22.3                 | 30.7              | 40.3              |
| NV-31-CoP/CC<br>(before sputtering) | 514.3               | 515.5            | 516.7                  | 518.0              | 7.2                | 19.9                 | 31.7              | 41.2              |
| NV-31-CP/CC<br>(after sputtering)   | 514.3               | 515.5            | 516.7                  | 517.8              | 9.1                | 16.7                 | 40.0              | 34.2              |
|                                     | Binding energy (eV) |                  |                        | Relative fractions |                    |                      |                   |                   |
|                                     | LO*                 | M-OH**           | S-H <sub>2</sub> O***  | % LO               | % M-OH             | % S-H <sub>2</sub> O |                   |                   |
| CoP/CC                              | --                  | 531.9            | 533.0                  | --                 | 9.65               | 90.35                |                   |                   |
| NV-31/CC                            | 530.3               | 531.5            | 533.0                  | 36.55              | 54.21              | 9.24                 |                   |                   |
| NV-31-CP/CC<br>(before sputtering)  | --                  | 532.0            | 533.0                  | --                 | 32.7               | 67.2                 |                   |                   |

|                                    |                            |            |       |                           |              |      |
|------------------------------------|----------------------------|------------|-------|---------------------------|--------------|------|
| NV-31-CP/CC<br>(after sputtering)  | --                         | 532.0      | 532.9 | --                        | 20.6         | 79.3 |
|                                    | <b>Binding energy (eV)</b> |            |       | <b>Relative fractions</b> |              |      |
|                                    | <b>P-O-C</b>               | <b>P-O</b> |       | <b>% P-O-C</b>            | <b>% P-O</b> |      |
| CoP/CC                             | 134.3                      | 135.2      |       | 50.7                      | 49.3         |      |
| NV-31-CP/CC<br>(before sputtering) | 134.0                      | 135.1      |       | 56.4                      | 43.6         |      |
| NV-31-CP/CC<br>(after sputtering)  | 134.0                      | 135.0      |       | 48.6                      | 51.4         |      |

\*LO: lattice oxygen, \*\*M-OH: metal hydroxide, \*\*\*S-H<sub>2</sub>O: surface adsorbed H<sub>2</sub>O

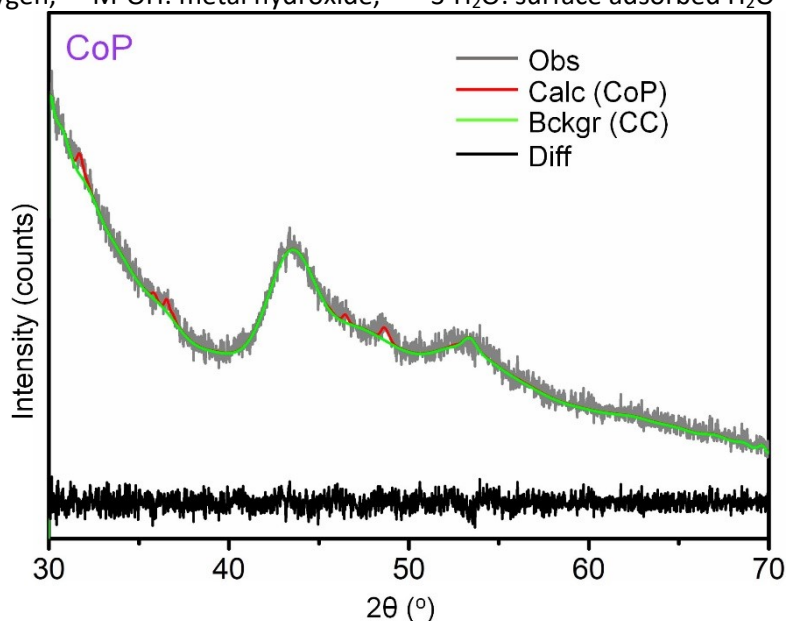

**Figure S2.** Rietveld refined XRD pattern of CoP. The legends: *diff* (difference plot between observed and calculated patterns); *Obs* (observed pattern); *Calc* (calculated pattern); *Bckgr* (background plot). Since CoP NWs were grown on carbon cloth (CC), the carbon reflections overshadow those from CoP. Hence, the carbon reflections were considered in the background while fitting the XRD pattern.

**Table S3.** XRD-Rietveld refinement parameters of CoP.

| Sample | Crystal structure<br>Space group | Lattice parameters (Å)                 | Angles<br>(°)                        | Volume<br>(Å <sup>3</sup> ) | Fitting<br>parameters                            |
|--------|----------------------------------|----------------------------------------|--------------------------------------|-----------------------------|--------------------------------------------------|
| CoP    | Orthorhombic<br><i>Pbnm</i>      | $a = 5.577, b = 5.009,$<br>$c = 3.269$ | $\alpha = \beta = \gamma = 90^\circ$ | 91.3                        | $\chi^2 = 0.84$<br>GOF = 0.91<br>$R_{wp} = 2.22$ |

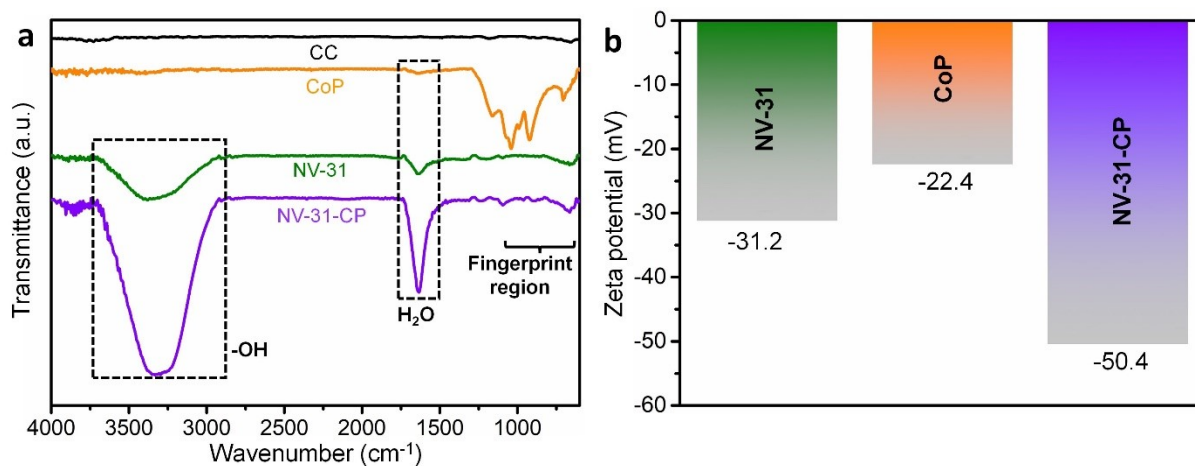

**Figure S3.** (a) FTIR spectra and (b) Zeta potential bar plots of NV-31, CoP and NV-31-CP.

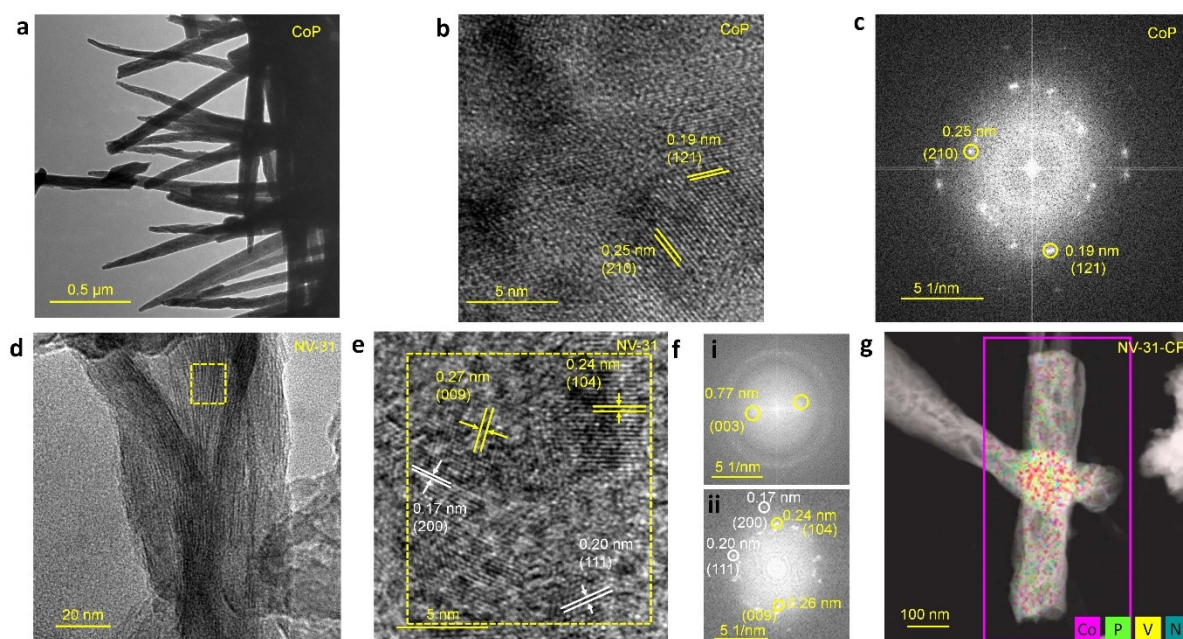

**Figure S4.** (a) Low and (b) high resolution TEM images, and (c) FFT pattern of CoP. (d) Low and (e) high resolution TEM images, and (f) FFT patterns of NV-31. Regions (i) and (ii) in panel (f) are from two locations indicated by yellow rectangles in panel (d) and (e), respectively. (g) HAADF-STEM elemental mapping of NV-31-CP.

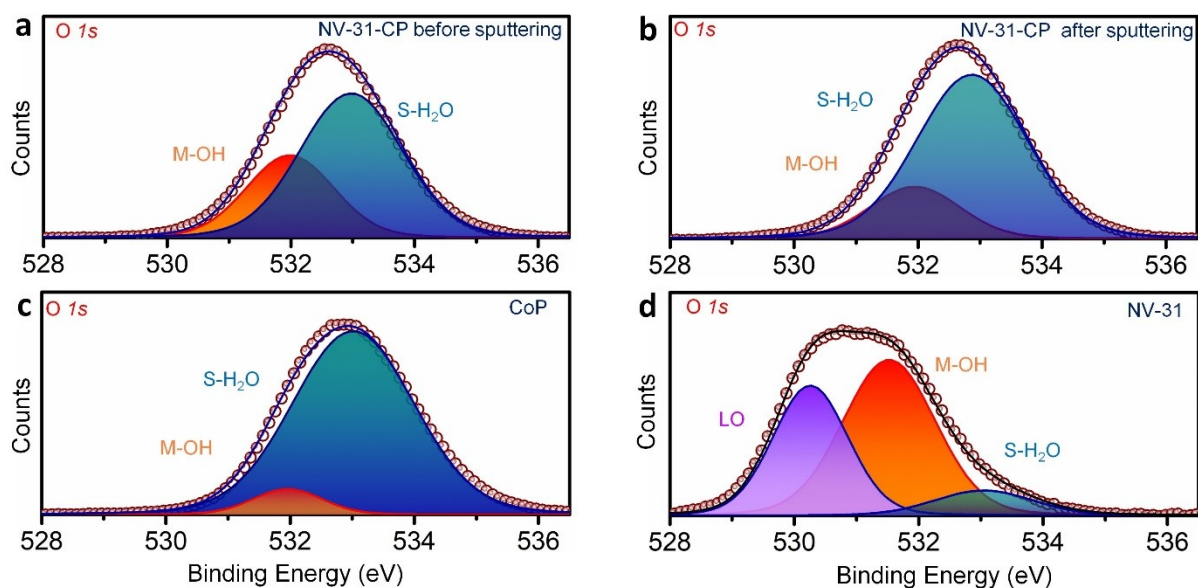

**Figure S5.** XPS plots of O 1s level for (a) NV-31-CP before Ar<sup>+</sup> ion sputtering, (b) NV-31-CP after Ar<sup>+</sup> ion sputtering, (c) CoP and (d) NV-31.

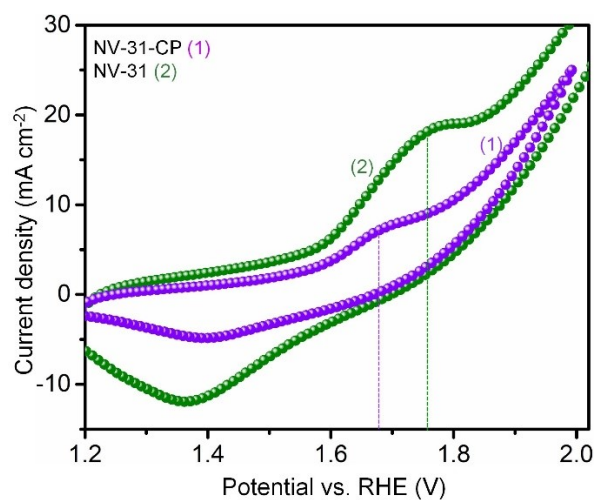

**Figure S6.** CV plots for NV-31 and NV-31-CP in PBS medium.

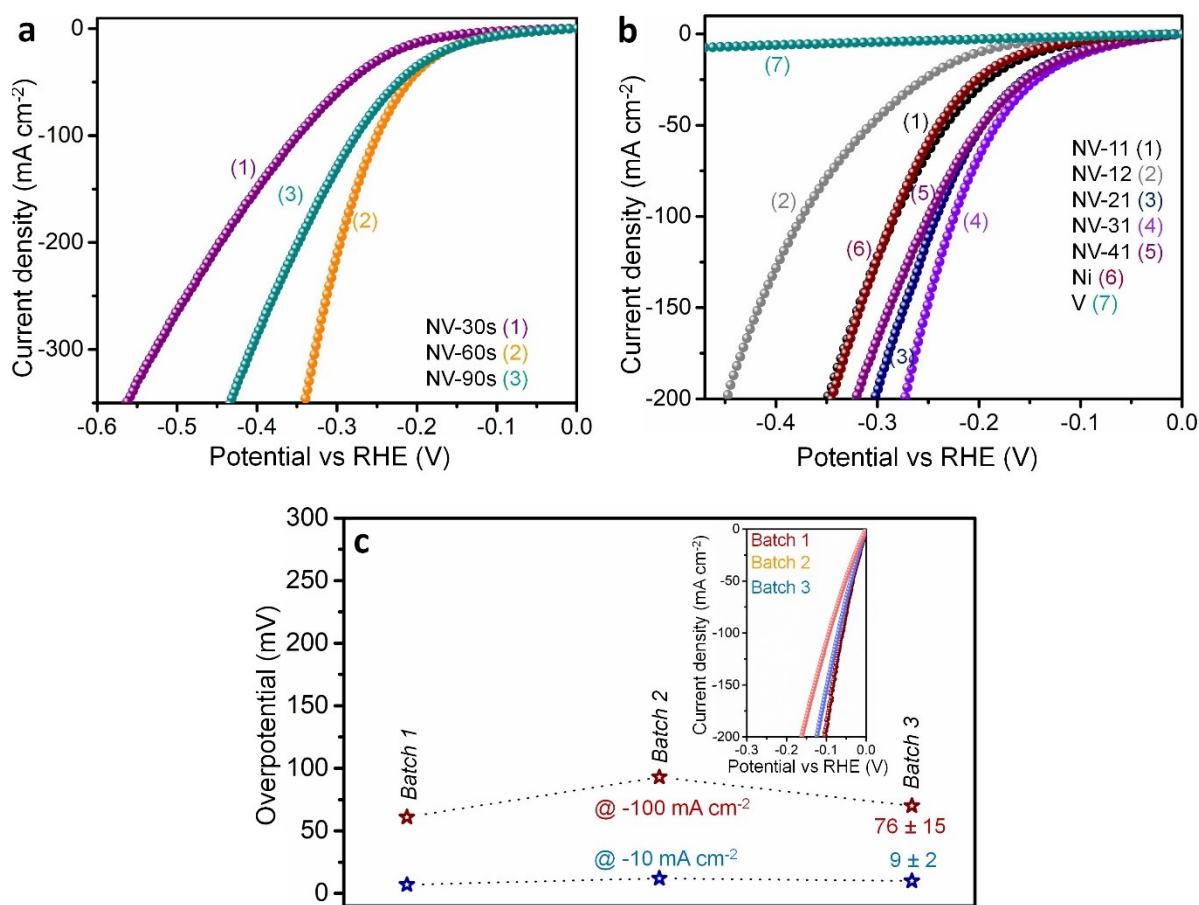

**Figure S7.** (a) LSV polarization curves for NV-30s ( $R_s = 5.8 \Omega$ ), NV-60s ( $R_s = 4.8 \Omega$ ), and NV-90s ( $R_s = 5.9 \Omega$ ). 30s, 60s and 90s indicate the time of electrodeposition of NiV-LDH on CC. (b) LSV polarization curves for NV-11 ( $R_s = 6.6 \Omega$ ), NV-12 ( $R_s = 6.6 \Omega$ ), NV-21 ( $R_s = 8.1 \Omega$ ), NV-31 ( $R_s = 4.8 \Omega$ ), NV-41 ( $R_s = 4.8 \Omega$ ), Ni ( $R_s = 6.1 \Omega$ ) and V ( $R_s = 5.5 \Omega$ ). (c) Overpotential scatter plots at -10, and -100 mA cm<sup>-2</sup> current densities of 20% Pt/C fabricated in three batches. Inset shows the corresponding LSV plots:  $R_s$  (batch 1) = 5.3  $\Omega$ ,  $R_s$  (batch 2) = 5.1  $\Omega$ , and  $R_s$  (batch 3) = 5.1  $\Omega$ .

**Table S4.** Solution resistance ( $R_s$ ) values obtained during the LSV polarization experiments for the HER electrocatalysts in different media.

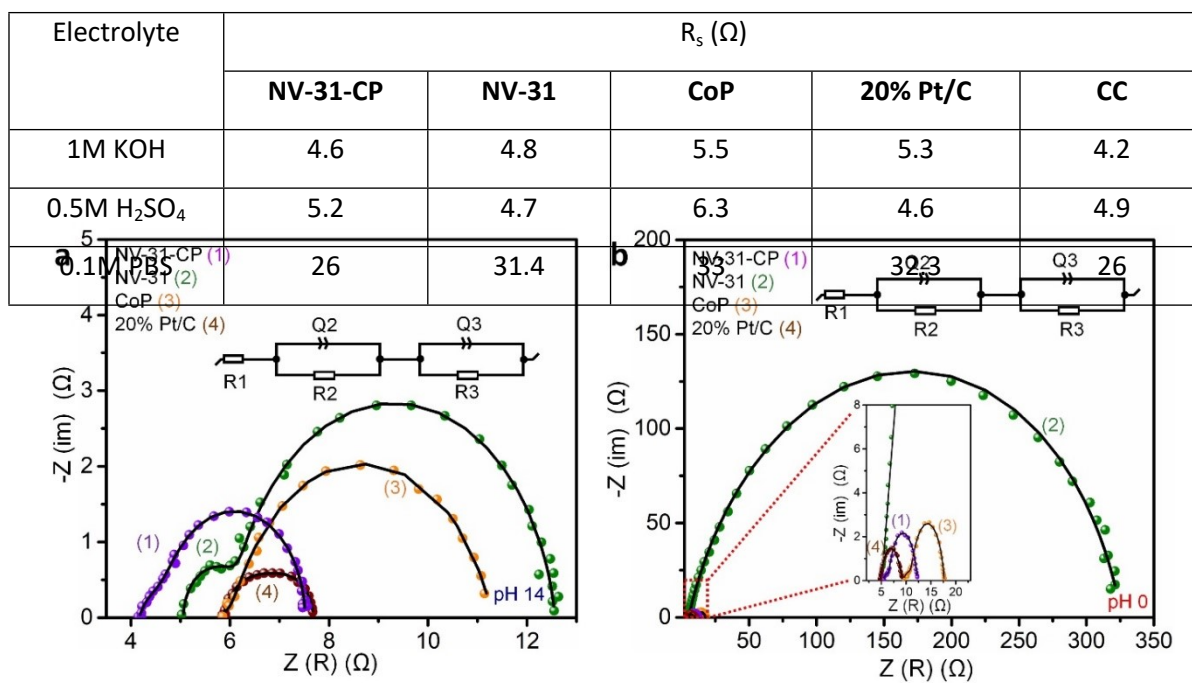

**Figure S8.** Fitted Nyquist plots for NV-31, CoP and NV-31-CP and 20% Pt/C in (a) 1M KOH at -1.15 V vs. Hg/HgO (1M NaOH), and (b) 0.5M H<sub>2</sub>SO<sub>4</sub> at -0.4V vs. saturated calomel electrode. Insets show the zoom in plots, and the corresponding equivalent circuits. Filled circles represent the experimental data and black lines represent the fitted plot for each catalyst.

**Table S5.** EIS parameters obtained for the HER electrocatalysts in different media.

| Electrolyte                                          | Catalyst | R <sub>s</sub> (Ω) | R <sub>CT1</sub> (Ω) | R <sub>CT2</sub> (Ω) |
|------------------------------------------------------|----------|--------------------|----------------------|----------------------|
| <b>1M KOH<br/>(pH = 14)</b>                          | NV-31-CP | 4.2                | 0.7                  | 2.7                  |
|                                                      | NV-31    | 5                  | 1.0                  | 6.5                  |
|                                                      | CoP      | 5.7                | 4.8                  | 0.8                  |
|                                                      | 20% Pt/C | 5.8                | 0.6                  | 0.8                  |
| <b>0.5M H<sub>2</sub>SO<sub>4</sub><br/>(pH = 0)</b> | NV-31-CP | 5.5                | 1.1                  | 5.7                  |
|                                                      | NV-31    | 5.1                | 198                  | 123                  |
|                                                      | CoP      | 9.4                | 6.4                  | 1.8                  |
|                                                      | 20% Pt/C | 4.6                | 1.8                  | 2.8                  |
| <b>0.1M PBS<br/>(pH = 7)</b>                         | NV-31-CP | 36.6               | 14.0                 | --                   |
|                                                      | NV-31    | 36.3               | 34.0                 | --                   |
|                                                      | CoP      | 35.9               | 49.9                 | --                   |
|                                                      | 20% Pt/C | 37.7               | 10.1                 | --                   |

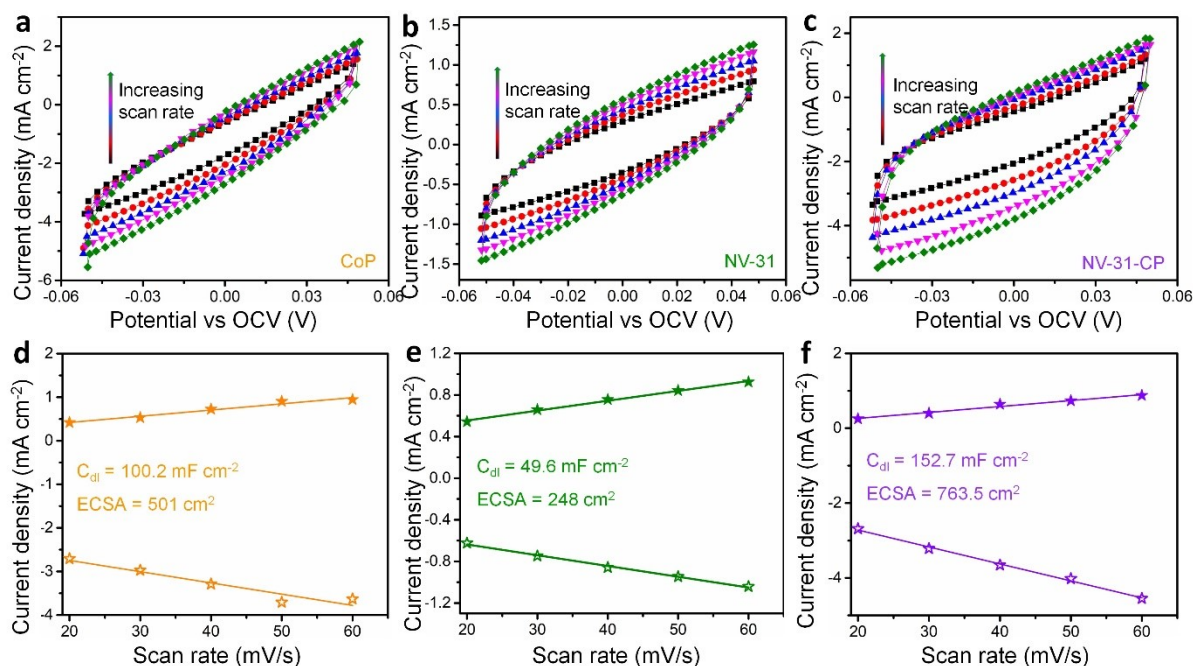



**Figure S9.** ECSA determination in 1M KOH. CV plots of (a) CoP, (b) NV-31, and (c) NV-31-CP at different scan rates. Plots of current density (recorded at a fixed potential) as a function of scan rate for (d) CoP, (e) NV-31, and (f) NV-31-CP.

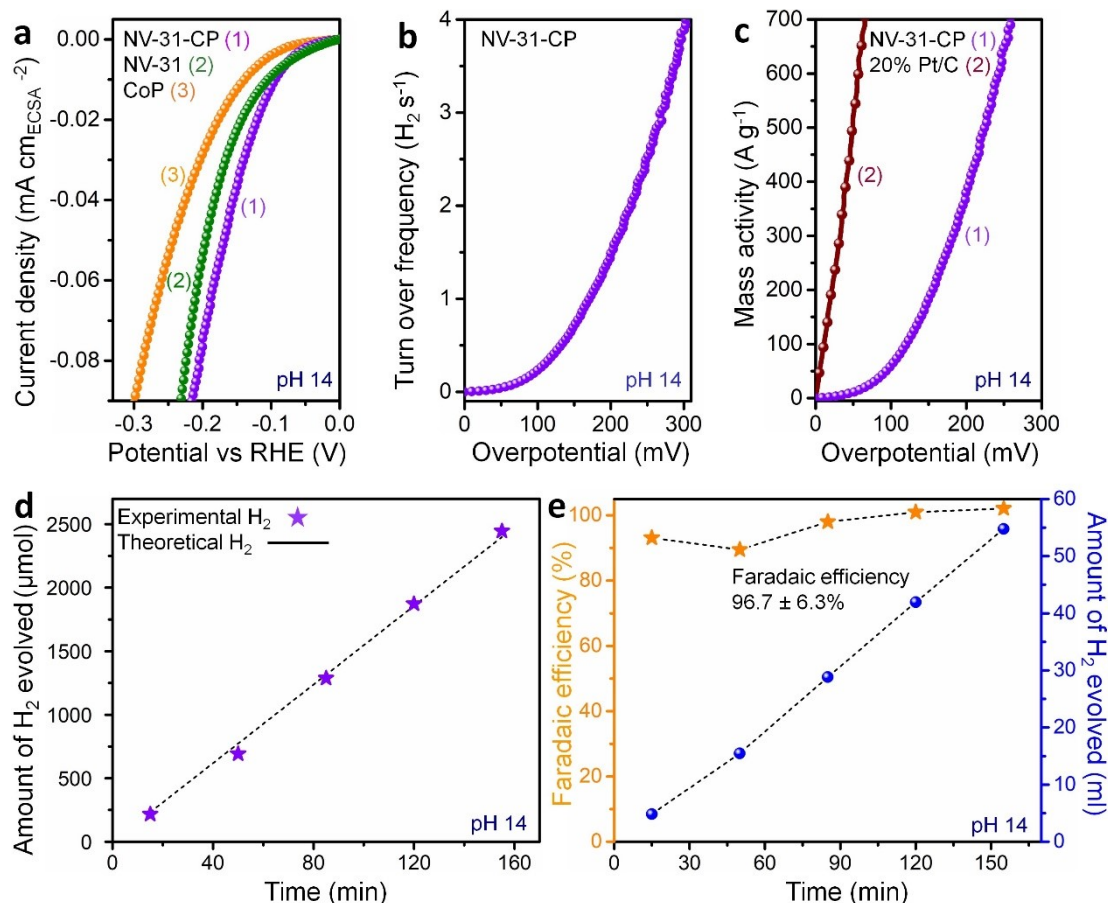

**Figure S10.** (a) ECSA normalized LSV polarization curves for NV-31, CoP and NV-31-CP in 1M KOH. (b) TOF of NV-31-CP in 1M KOH. (c) The mass activity of NV-31-CP and 20% Pt/C in 1M KOH. (d) Time dependent evolution of H<sub>2</sub> (μmol). (e) Determination of Faradaic efficiency of NV-31-CP electrocatalyst from the evolved H<sub>2</sub> (ml) in 1M KOH at -160 mV vs RHE.

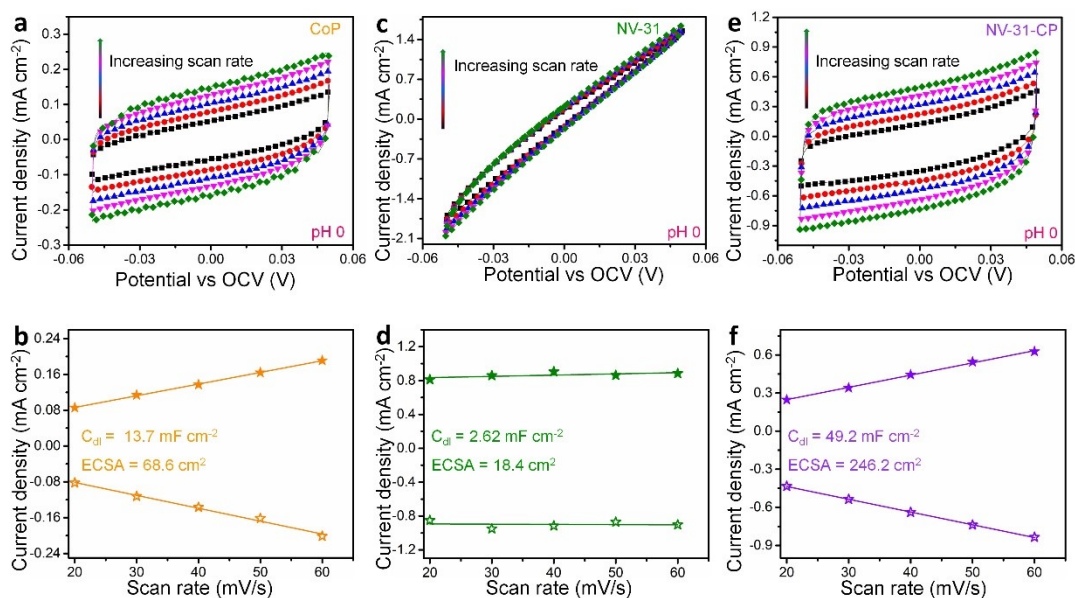

**Figure S11.** ECSA determination in 0.5M H<sub>2</sub>SO<sub>4</sub>. CV plots of (a) CoP, (b) NV-31 and (c) NV-31-CP at different scan rates. Plots of current density (recorded at a fixed potential) as a function of scan rate for (d) CoP, (e) NV-31 and (f) NV-31-CP.

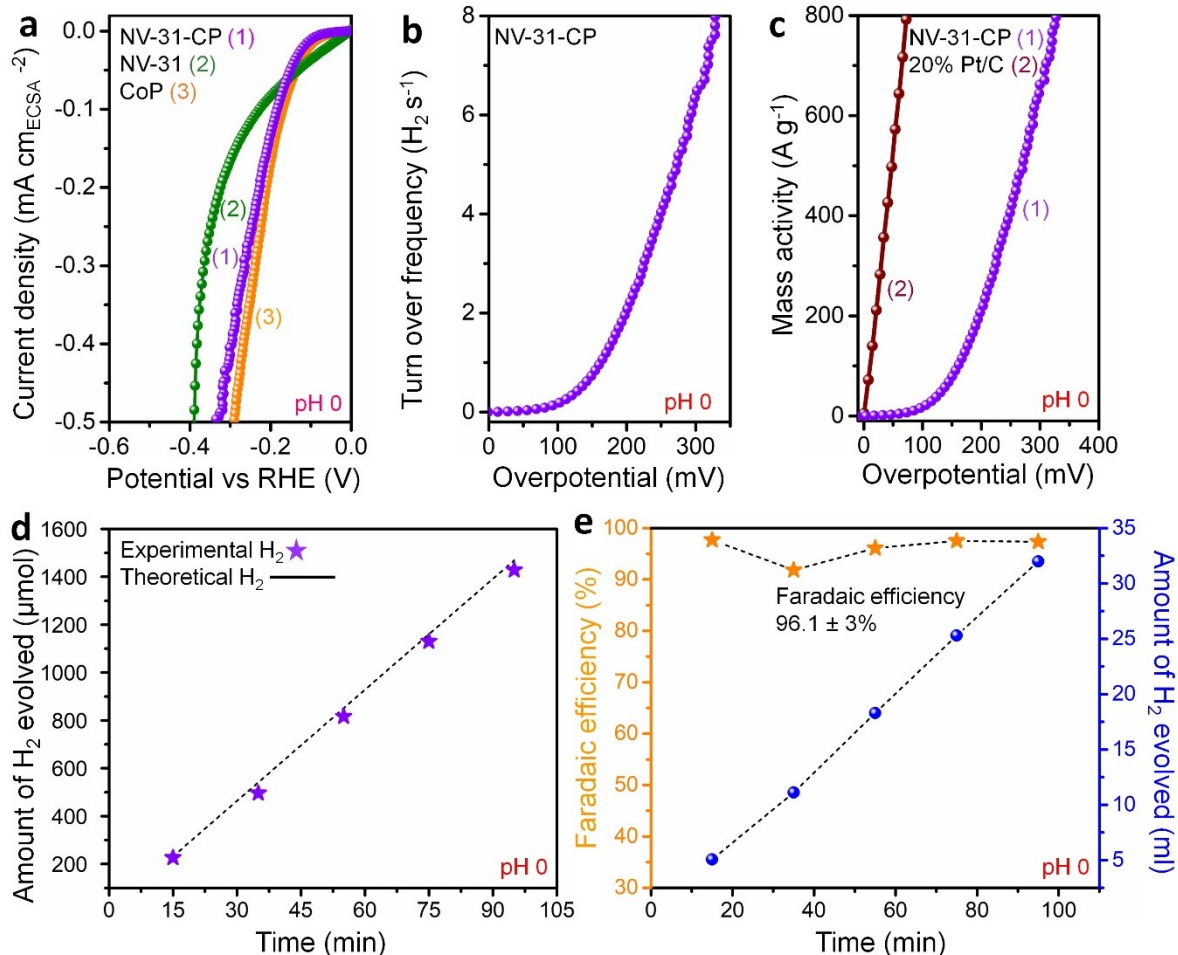

**Figure S12.** (a) ECSA normalized LSV polarization curves for NV-31, CoP and NV-31-CP in 0.5M H<sub>2</sub>SO<sub>4</sub>. (b) TOF of NV-31-CP in 0.5M H<sub>2</sub>SO<sub>4</sub>. (c) The mass activity of NV-31-CP and 20% Pt/C in 0.5M H<sub>2</sub>SO<sub>4</sub>. (d) Time dependent evolution of H<sub>2</sub> (μmol). (e) Determination of Faradaic efficiency of NV-31-CP electrocatalyst from the evolved H<sub>2</sub> (ml) in 0.5M H<sub>2</sub>SO<sub>4</sub> at -202 mV vs. RHE.

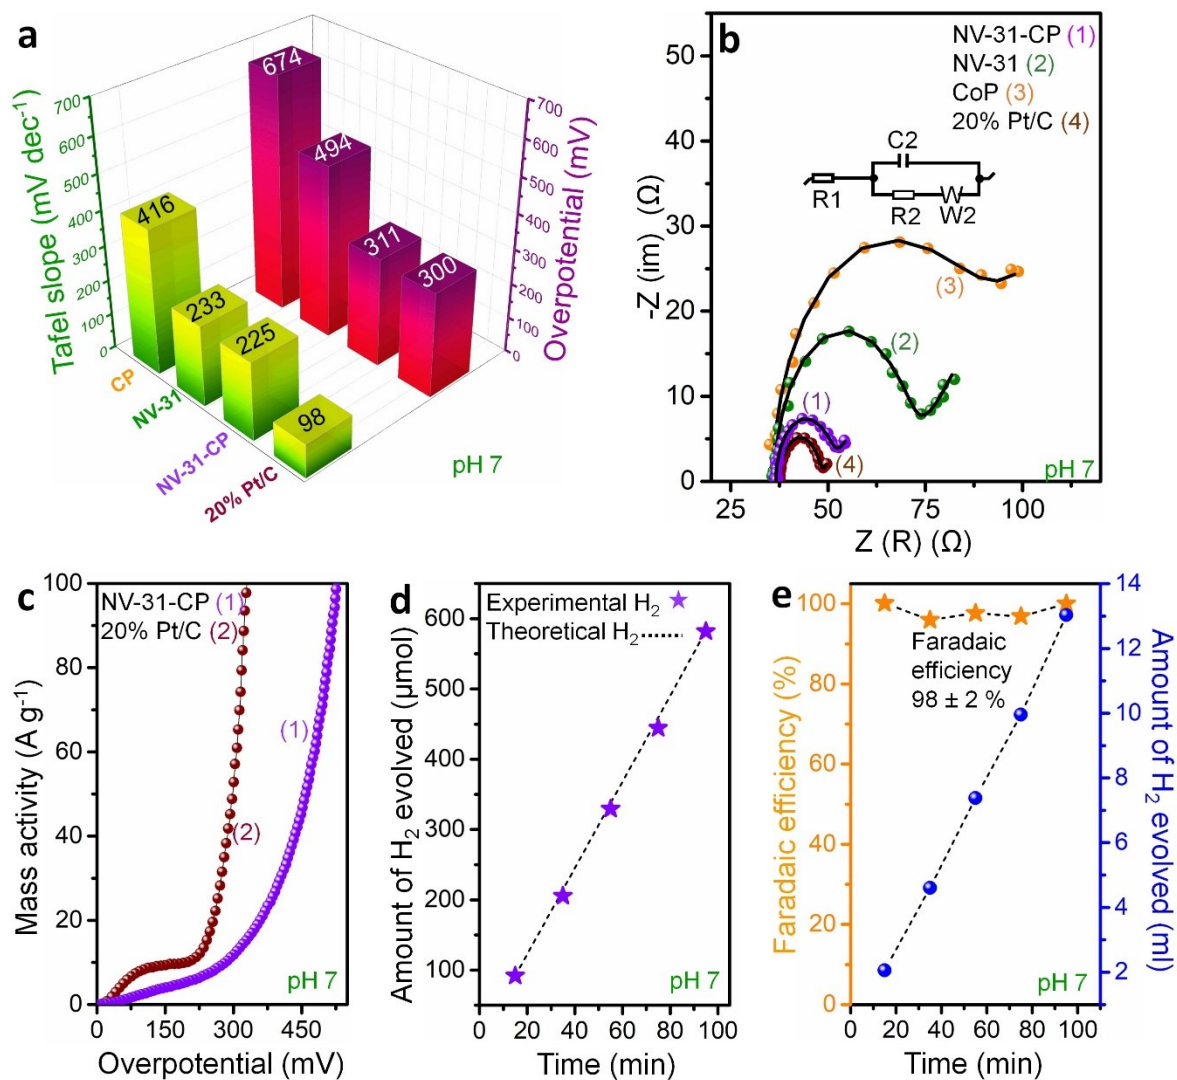

**Figure S13.** (a) Bar plots of Tafel slopes and overpotentials, and (b) fitted Nyquist plots of NV-31, CoP, NV-31-CP and 20% Pt/C in PBS medium at -1.2 V vs. Ag/AgCl (1M KCl). Inset shows the corresponding equivalent circuit. Filled circles represent experimental data and black lines represent the fitted data for each catalyst. (c) The mass activity of NV-31-CP and 20% Pt/C in PBS medium. (d) Time dependent evolution of H<sub>2</sub> (μmol). (e) Determination of Faradaic efficiency of NV-31-CP electrocatalyst from the evolved H<sub>2</sub> (ml) in PBS medium at -554 mV vs. RHE.

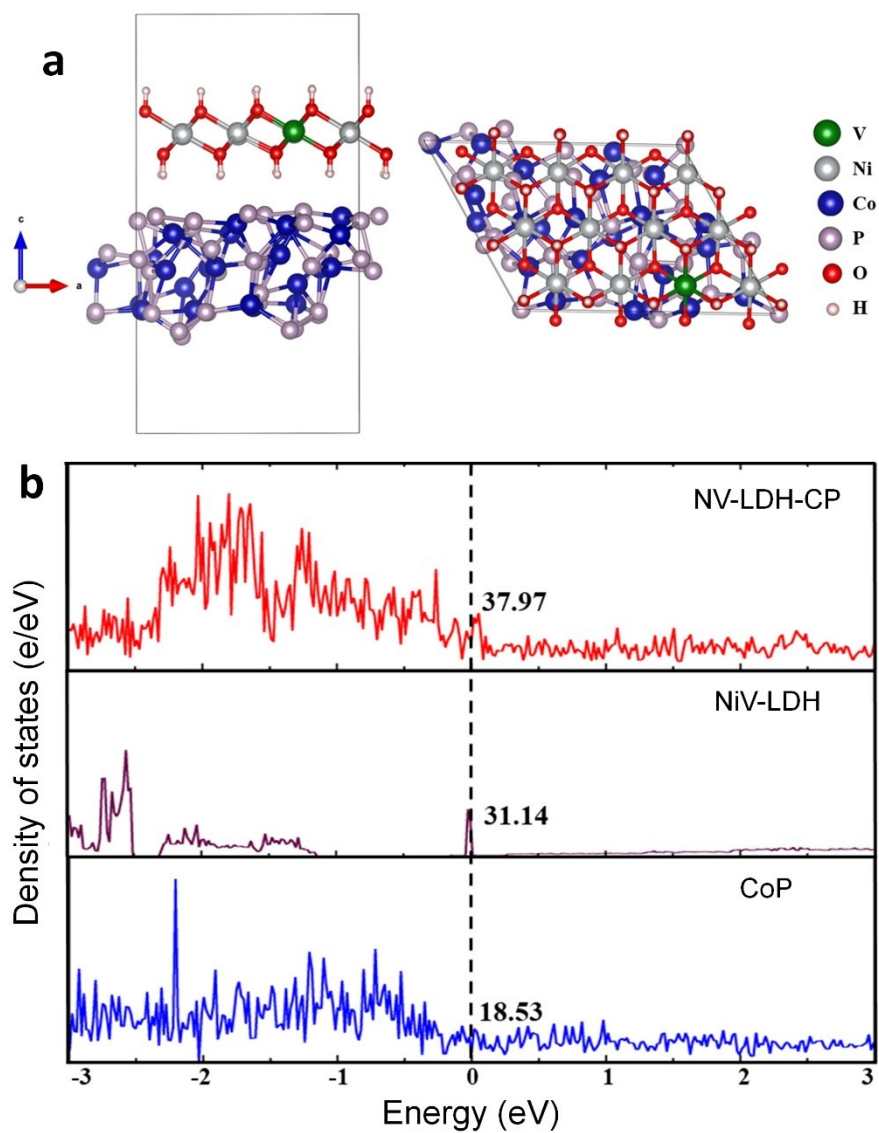

**Figure S14.** (a) Top and side views of NV-LDH - CP. (b) The DOS of CoP, NiV-LDH and NV-LDH - CP. Fermi energy is denoted by a dashed line.

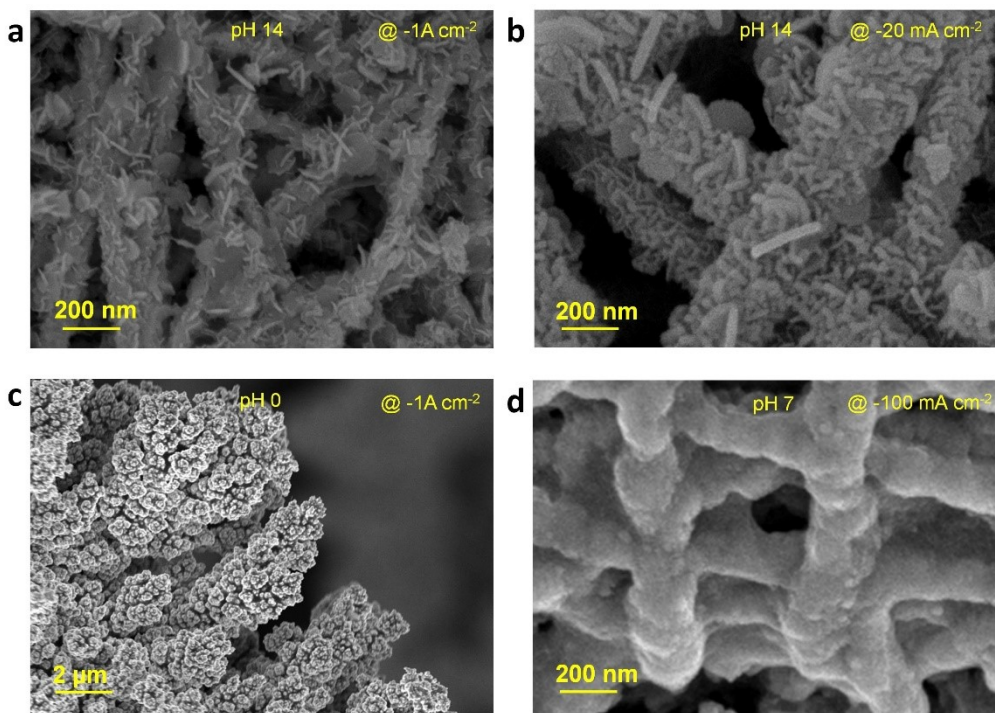

**Figure S15.** FESEM images of the NV-31-CP/CC electrode after the 200h stability test with Pt wire counter electrode in (a) 1M KOH by applying  $-1A\text{ cm}^{-2}$  current density, (b) 1 M KOH by applying  $-20\text{ mA cm}^{-2}$ , (c) 0.5M  $\text{H}_2\text{SO}_4$  by applying  $-1\text{ A cm}^{-2}$ , and (d) 0.1M PBS by applying  $-100\text{ mA cm}^{-2}$ .

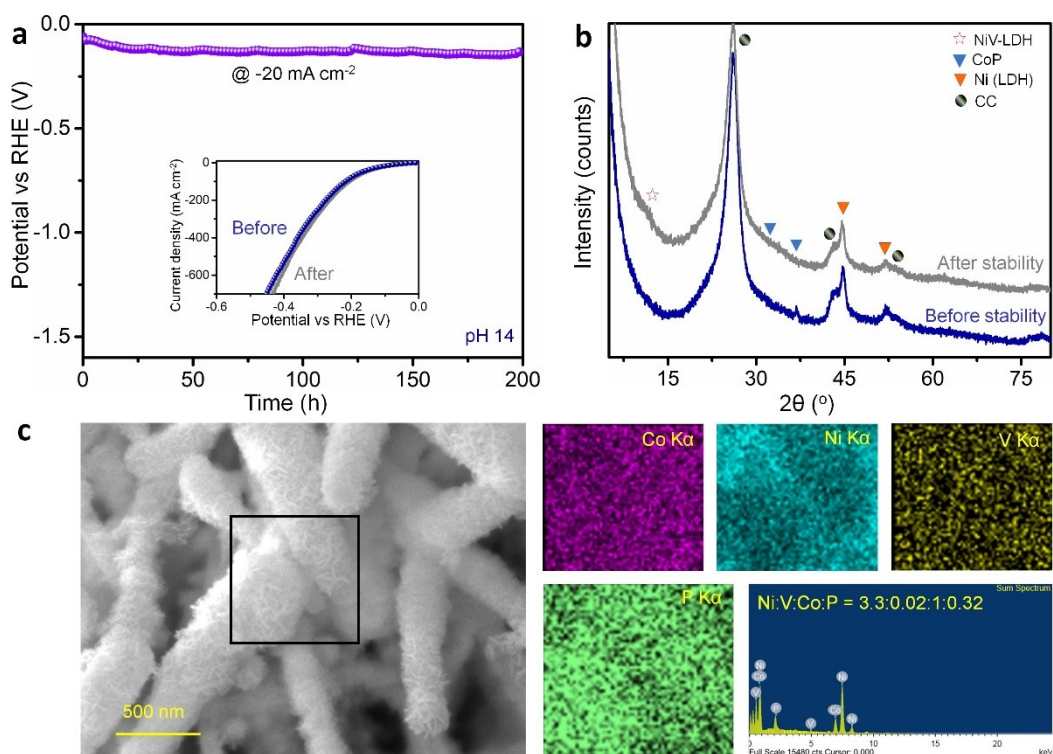

**Figure S16.** (a) Stability test of NV-31-CP/CC in 1M KOH at an applied current density of  $-20\text{ mA cm}^{-2}$  with Pt wire counter electrode. Inset shows the LSV polarization curve before and after the stability test ( $R_s = 3.8\ \Omega$ ). (b) XRD patterns of the electrode before and after the stability test. (c) Elemental mapping and EDX spectrum after the stability test from the selected region of the FESEM image of NV-31-CP.

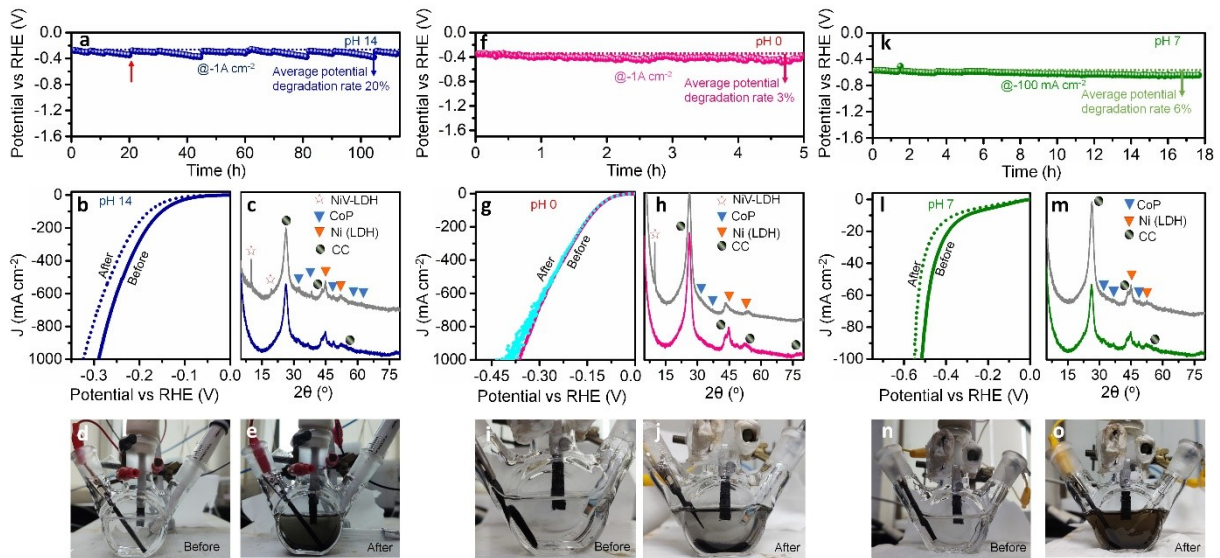

**Figure S17. HER operational stability tests of NV-31-CP heterostructure at all pH with graphite rod counter electrode.** (a) Chronopotentiometry at  $-1 \text{ A cm}^{-2}$  for 113 h in 1M KOH ( $R_s = 4.3 \Omega$ ), along with (b) LSV plots ( $R_s = 4.0 \Omega$ ), (c) XRD patterns, and (d, e) digital images before and after the stability test. (f) Chronopotentiometry at  $-1 \text{ A cm}^{-2}$  for 5 h in 0.5M  $\text{H}_2\text{SO}_4$  ( $R_s = 5.5 \Omega$ ), along with (g) LSV plots ( $R_s = 5.5 \Omega$ ), (h) XRD patterns, and (i, j) digital images before and after the stability test. (k) Chronopotentiometry at  $-100 \text{ mA cm}^{-2}$  for 18 h in 0.1M PBS medium ( $R_s = 35 \Omega$ ), along with (l) LSV plots ( $R_s = 35 \Omega$ ), (m) XRD patterns, and (n, o) digital images before and after the stability test. The up arrow in panel (a) indicate the point of electrolyte addition in order to maintain the electrode area.

**Table S6.** Comparison of the reported LDH-based HER electrocatalysts with NV-31-CP.

| Sl. No | Catalyst                                      | $\eta$ (mV)<br>-10 mA cm <sup>-2</sup> | $\eta$ (mV)<br>-100 mA cm <sup>-2</sup> | Electrolyte                                               | Substrate | Stability (h) | Ref              |
|--------|-----------------------------------------------|----------------------------------------|-----------------------------------------|-----------------------------------------------------------|-----------|---------------|------------------|
| 1      | NiFeRu-LDH                                    | 29                                     | -                                       | 1M KOH                                                    | NF*       | 10            | S1               |
| 2      | NF@NiFe LDH/CeO <sub>x</sub>                  | 154                                    | 267                                     | 1M KOH                                                    | NF        | 20            | S2               |
| 3      | e-ICLDH@GDY/NF                                | 43                                     | 215                                     | 1M KOH                                                    | NF        | 80            | S3               |
| 4      | NiFe <sub>2</sub> O <sub>4</sub> /NiFe LDH/NF | 101                                    | 229                                     | 1M KOH                                                    | NF        | 20            | S4               |
| 5      | FeNi@FeNi                                     | 127                                    | 253@-50                                 | 1M KOH                                                    | NF        | 30            | S5               |
| 6      | Ni@NiFe LDH                                   | 92                                     | 233                                     | 1M KOH                                                    | NF        | 24            | S6               |
| 7      | v-NiFe LDH                                    | 87                                     | -                                       | 1M PBS                                                    | NF        | 100           | S7               |
| 8      | CoNiSe <sub>2</sub> @CoNi-LDHs/NF             | 106                                    | -                                       | 1M KOH                                                    | NF        | 30            | S8               |
| 9      | CoFeCo PBA                                    | 155                                    | 330                                     | 1M KOH                                                    | CC**      | 50            | S9               |
| 10     | Rh/NiFeRh-LDH                                 | 57                                     | -                                       | 1M KOH                                                    | NF        | 6             | S10              |
| 11     | V-Ce/CoFe LDH                                 | 73<br>212                              | -                                       | 1M KOH<br>1M PBS                                          | NF        | 60            | S11              |
| 12     | Rh-doped CoFe-LDH                             | 28                                     | 188@-600                                | 1M KOH                                                    | NF        | 10            | S12              |
| 13     | Ru-CoV-LDH@NF                                 | 32                                     | -                                       | 1M KOH                                                    | NF        | 45            | S13              |
| 14     | Ru <sub>1</sub> /D-NiFe LDH                   | 18                                     | 61                                      | 1M KOH                                                    | NF        | 100           | S14              |
| 15     | NV-31-CP/CC                                   | 55<br>93<br>311                        | 133<br>173<br>--                        | 1M KOH<br>0.5M H <sub>2</sub> SO <sub>4</sub><br>0.1M PBS | CC        | 200           | <i>This work</i> |

\* NF- Nickel Foam; \*\*CC- Carbon Cloth

**Table S7.** Comparison of the reported CoP-based HER catalyst with NV-31-CP.

| Sl. No | Catalyst                                | $\eta$ (mV)<br>-10 mA cm <sup>-2</sup> | $\eta$ (mV)<br>-100 mA cm <sup>-2</sup>                        | Electrolyte                                               | Substrate   | Stability (h) | Ref              |
|--------|-----------------------------------------|----------------------------------------|----------------------------------------------------------------|-----------------------------------------------------------|-------------|---------------|------------------|
| 1      | CoP/CC                                  | 209<br>106<br>67                       | --<br>--<br>204                                                | 1M KOH<br>1M PBS<br>0.5M H <sub>2</sub> SO <sub>4</sub>   | CC*         | 5000<br>CV    | S15              |
| 2      | V-CoP/CC                                | 71<br>123<br>47                        | -                                                              | 1M KOH<br>1M PBS<br>0.5M H <sub>2</sub> SO <sub>4</sub>   | CC          | 25            | S16              |
| 3      | Ce doped CoP                            | 92<br>54                               | 161-<br>120                                                    | 1M KOH<br>0.5M H <sub>2</sub> SO <sub>4</sub>             | Ti plates   | 10            | S17              |
| 4      | Fe-CoP UNSs                             | 67                                     | 148                                                            | 1M KOH                                                    | NF**        | 50            | S18              |
| 5      | CoP NWs                                 | -                                      | 244                                                            | 1M KOH                                                    | Cobalt foam | 48            | S19              |
| 6      | CoP/Co <sub>2</sub> P                   | 103<br>99                              | 155@50 mA<br>cm <sup>-2</sup><br>146@50 mA<br>cm <sup>-2</sup> | 1M KOH<br>0.5M H <sub>2</sub> SO <sub>4</sub>             | GC          | <8            | S20              |
| 7      | CoP/Ni <sub>5</sub> P <sub>4</sub> /CoP | 71<br>33                               | 140<br>85                                                      | 1M KOH<br>0.5M H <sub>2</sub> SO <sub>4</sub>             | NF          | 27            | S21              |
| 8      | NiCo <sub>2</sub> -B-P                  | 78                                     | -                                                              | 1M KOH                                                    | NF          | 9             | S22              |
| 9      | B-CoP/CNT                               | 56<br>79<br>39                         | -                                                              | 1M KOH<br>1M PBS<br>0.5M H <sub>2</sub> SO <sub>4</sub>   | GC***       | 100           | S23              |
| 10     | CoP/Co-MOF                              | 34<br>49<br>27                         | -                                                              | 1M KOH<br>1M PBS<br>0.5M H <sub>2</sub> SO <sub>4</sub>   | CFP****     | 16.5          | S24              |
| 11     | CoP-InNC@CNT                            | 159<br>153                             | -                                                              | 1M KOH<br>0.5M H <sub>2</sub> SO <sub>4</sub>             | GC          | 20            | S25              |
| 12     | NiCo <sub>16-x</sub> P <sub>x</sub>     | 88                                     | -                                                              | 1M KOH                                                    | GC/CFP      | 10            | S26              |
|        | NV-31-CP/CC                             | 55<br>93<br>311                        | 133<br>173<br>--                                               | 1M KOH<br>0.5M H <sub>2</sub> SO <sub>4</sub><br>0.1M PBS | CC          | 200           | <i>This work</i> |

\*CC- Carbon Cloth, \*\*NF- Nickel Foam, \*\*\*GC-Glassy Carbon, \*\*\*\*CFP-Carbon Fiber Paper



**Table S8.** Comparison of the reported self-supported electrodes for HER with NV-31-CP/CC.

| Sl. No | Catalyst                                                        | $\eta$ (mV)<br>-10 mA cm <sup>-2</sup> | $\eta$ (mV)<br>-100 mA cm <sup>-2</sup> | Electrolyte                                             | Substrate | Stability (h) | Ref              |
|--------|-----------------------------------------------------------------|----------------------------------------|-----------------------------------------|---------------------------------------------------------|-----------|---------------|------------------|
| 1      | RuP/CC<br>RuP <sub>2</sub> /CC                                  | 13<br>33                               | 53<br>-                                 | 1M KOH                                                  | CC*       | 20            | S27              |
| 2      | N-Co <sub>3</sub> O <sub>4</sub> @C@NF                          | 42                                     | -                                       | 1M KOH                                                  | NF**      | 60            | S28              |
| 4      | VC@NC/CC                                                        | 151<br>130                             | 317<br>238                              | 1M KOH<br>0.5M H <sub>2</sub> SO <sub>4</sub>           | CC        | 20            | S29              |
| 5      | CoFe-P/NF                                                       | 83                                     | 180                                     | 1M KOH                                                  | NF        | 25            | S30              |
| 6      | Mo <sub>2</sub> C-3 M<br>Ni(NO <sub>3</sub> ) <sub>2</sub> /CFP | 56                                     | -                                       | 0.5M H <sub>2</sub> SO <sub>4</sub>                     | CFP***    | 35            | S31              |
| 7      | Ni <sub>x</sub> P/NF                                            | 71                                     | 153                                     | 1M KOH                                                  | NF        | 40            | S32              |
| 8      | Cu-m/Cu-<br>W/NiCo-LDH                                          | 15<br>27                               | 72<br>112                               | 1M KOH<br>0.5M H <sub>2</sub> SO <sub>4</sub>           | Cu-m      | 120<br>50     | S33              |
| 9      | NiCoP@NC<br>NA/NF                                               | 37<br>34                               | 186<br>150                              | 1M KOH<br>0.5M H <sub>2</sub> SO <sub>4</sub>           | NF        | 22            | S34              |
| 11     | TiC@MoS <sub>2</sub>                                            | 127                                    | 160<br>@50 mA cm <sup>-2</sup>          | 0.5M H <sub>2</sub> SO <sub>4</sub>                     | TiC       | 24            | S35              |
| 12     | PS-Cu                                                           | 121<br>261<br>182                      | 534<br>568<br>340                       | 1M KOH<br>1M PBS<br>0.5M H <sub>2</sub> SO <sub>4</sub> | Cu-m****  | 30            | S36              |
| 13     | WP-W <sub>2</sub> C/W                                           | 43                                     | 139<br>560 @1000<br>mA cm <sup>-2</sup> | 1M KOH                                                  | W foil    | 60            | S37              |
| 15     | NiCo-LDH-1T-<br>WS <sub>2</sub> /CC                             | 134                                    | -                                       | 1M KOH                                                  | CC        | 60            | S38              |
| 16     | Cu@(Ni/NiO)                                                     | 67                                     | --                                      | 1M KOH                                                  | MC*****   | 24            | S39              |
| 17     | Ni <sub>2</sub> P/V <sub>2</sub> O <sub>3-x</sub>               | 59                                     | --                                      | 1M KOH                                                  | NF        | 100           | S40              |
|        | NV-31-CP/CC                                                     | 55<br>93<br>311                        | 133<br>173<br>--                        | 1M KOH<br>0.5M H <sub>2</sub> SO <sub>4</sub><br>PBS    | CC        | 200           | <i>This work</i> |

\*CC- Carbon Cloth, \*\*NF- Nickel Foam, \*\*\*CFP- Carbon Fiber Paper, \*\*\*\*Cu-m- Cu mesh, \*\*\*\*\*MC-

### Supporting References

- (S1) G. Chen, T. Wang, J. Zhang, P. Liu, H. Sun, X. Zhuang, M. Chen and X. Feng, *Adv. Mater.*, 2018, **30**, 1–7.
- (S2) X. Wang, Y. Yang, L. Diao, Y. Tang, F. He, E. Liu, C. He, C. Shi, J. Li, J. Sha, S. Ji, P. Zhang, L. Ma and N. Zhao., *ACS Appl. Mater. Interfaces*, 2018, **10**, 35145–35153.
- (S3) L. Hui, Y. Xue, B. Huang, H. Yu, C. Zhang, D. Zhang, D. Jia, Y. Zhao, Y. Li, H. Liu and Y. Li, *Nat. Commun.*, 2018, **9**, 1–11.
- (S4) Z. Wu, Z. Zou, J. Huang and F. Gao, *ACS Appl. Mater. Interfaces*, 2018, **10**, 26283–26292.
- (S5) K. Huang, R. Dong, C. Wang, W. Li, H. Sun and B. Geng, *ACS Sustain. Chem. Eng.*, 2019, **7**, 15073–15079.
- (S6) Z. Cai, X. Bu, P. Wang, W. Su, R. Wei, J. C. Ho, J. Yang and X. Wang, *J. Mater. Chem. A*, 2019, **7**, 21722–21729.
- (S7) Z. Yuan, S. M. Bak, P. Li, Y. Jia, L. Zheng, Y. Zhou, L. Bai, E. Hu, X. Q. Yang, Z. Cai, Y. Sun and X. Sun, *ACS Energy Lett.*, 2019, **4**, 1412–1418.
- (S8) Y. Yang, W. Zhang, Y. Xiao, Z. Shi, X. Cao, Y. Tang and Q. Gao, *Appl. Catal. B Environ.*, 2019, **242**, 132–139.
- (S9) B. Singh, O. Prakash, P. Maiti, P. W. Menezes and A. Indra, *Chem. Commun.*, 2020, **56**, 15036–15039.
- (S10) B. Zhang, C. Zhu, Z. Wu, E. Stavitski, Y. H. Lui, T. H. Kim, H. Liu, L. Huang, X. Luan, L. Zhou, K. Jiang, W. Huang, S. Hu, H. Wang and J. S. Francisco, *Nano Lett.*, 2020, **20**, 136–144.
- (S11) S. Liu, J. Zhu, M. Sun, Z. Ma, K. Hu, T. Nakajima, X. Liu, P. Schmuki and L. Wang, *J. Mater. Chem. A*, 2020, **8**, 2490–2497.
- (S12) K. Zhu, J. Chen, W. Wang, J. Liao, J. Dong, M. O. L. Chee, N. Wang, P. Dong, P. M. Ajayan, S. Gao, J. Shen and M. Ye, *Adv. Funct. Mater.*, 2020, **30**, 1–10.
- (S13) W. Li, B. Feng, L. Yi, J. Li and W. Hu, *ChemSusChem*, 2021, **14**, 730–737.
- (S14) P. Zhai, M. Xia, Y. Wu, G. Zhang, J. Gao, B. Zhang, S. Cao, Y. Zhang, Z. Li, Z. Fan, C. Wang, X. Zhang, J. T. Miller, L. Sun and J. Hou, *Nat. Commun.*, 2021, **12**, 1–11.

- (S15) J. Tian, Q. Liu, A. M. Asiri and X. Sun, *J. Am. Chem. Soc.*, 2014, **136**, 7587–7590.
- (S16) X. Xiao, L. Tao, M. Li, X. Lv, D. Huang, X. Jiang, H. Pan, M. Wang and Y. Shen, *Chem. Sci.*, 2018, **9**, 1970–1975.
- (S17) W. Gao, M. Yan, H. Y. Cheung, Z. Xia, X. Zhou, Y. Qin, C. Y. Wong, Y. Qu, C. R. Chang and J. C. Ho, *Nano Energy*, 2017, **38**, 290–296.
- (S18) Y. Li, F. Li, Y. Zhao, S. N. Li, J. H. Zeng, H. C. Yao and Y. Chen, *J. Mater. Chem. A*, 2019, **7**, 20658–20666.
- (S19) W. Li, X. Gao, D. Xiong, F. Xia, J. Liu, W. G. Song, J. Xu, S. M. Thalluri, M. F. Cerqueira, X. Fu and L. Liu, *Chem. Sci.*, 2017, **8**, 2952–2958.
- (S20) L. Chen, Y. Zhang, H. Wang, Y. Wang, D. Li and C. Duan, *Nanoscale*, 2018, **10**, 21019–21024.
- (S21) I. K. Mishra, H. Zhou, J. Sun, F. Qin, K. Dahal, J. Bao, S. Chen and Z. Ren, *Energy Environ. Sci.*, 2018, **11**, 2246–2252.
- (S22) M. Liu, Q. He, S. Huang, W. Zou, J. Cong, X. Xiao, P. Li, J. Cai and L. Hou, *ACS Appl. Mater. Interfaces*, 2021, **13**, 9932–9941.
- (S23) E. Cao, Z. Chen, H. Wu, P. Yu, Y. Wang, F. Xiao, S. Chen, S. Du, Y. Xie, Y. Wu and Z. Ren, *Angew. Chem. Int. Ed.*, 2020, **59**, 4154–4160.
- (S24) T. Liu, P. Li, N. Yao, G. Cheng, S. Chen, W. Luo and Y. Yin, *Angew. Chem. Int. Ed.*, 2019, **58**, 4679–4684.
- (S25) L. Chai, Z. Hu, X. Wang, Y. Xu, L. Zhang, T. T. Li, Y. Hu, J. Qian and S. Huang, *Adv. Sci.*, 2020, **7**, 1903195.
- (S26) Y. Zhao, J. Zhang, Y. Xie, B. Sun, J. Jiang, W. J. Jiang, S. Xi, H. Y. Yang, K. Yan, S. Wang, X. Guo, P. Li, Z. Han, X. Lu, H. Liu and G. Wang, *Nano Lett.*, 2021, **21**, 823–832.
- (S27) R. Ge, S. Wang, J. Su, Y. Dong, Y. Lin, Q. Zhang and L. Chen, *Nanoscale*, 2018, **10**, 13930–13935.
- (S28) Y. Ha, L. Shi, Z. Chen and R. Wu, *Adv. Sci.*, 2019, **6**, 1900272.
- (S29) L. Guo, Y. Liu, X. Teng, Y. Niu, S. Gong and Z. Chen, *ChemSusChem*, 2020, **13**, 3671–3678.
- (S30) X. Wang, C. Wang, F. Lai, H. Sun, N. Yu and B. Geng, *ACS Appl. Nano Mater.*, 2021, **4**, 12083–12090.
- (S31) Z. Hu, L. Zhang, J. Huang, Z. Feng, Q. Xiong, Z. Ye, Z. Chen, X. Li and Z. Yu, *Nanoscale*, 2021, **13**, 8264–8274.
- (S32) Y. Wang, L. Liu, X. Zhang, F. Yan, C. Zhu and Y. Chen, *J. Mater. Chem. A*, 2019, **7**, 22412–22419.
- (S33) S. Parvin, A. Kumar, A. Ghosh and S. Bhattacharyya, *Chem. Sci.*, 2020, **11**, 3893–3902.
- (S34) B. Cao, Y. Cheng, M. Hu, P. Jing, Z. Ma, B. Liu, R. Gao and J. Zhang, *Adv. Funct. Mater.*, 2019, **29**, 1–18.
- (S35) Y. Shi, D. Zheng, X. Zhang, K. Lv, F. Wang, B. Dong, S. Wang, C. Yang, J. Li, F. Yang, L. Y. Hao, L. Yin, X. Xu, Y. Xian and S. Agathopoulos, *Chem. Mater.*, 2021, **33**, 6217–6226.
- (S36) W. J. Kang, Y. Feng, Z. Li, W. Q. Yang, C. Q. Cheng, Z. Z. Shi, P. F. Yin, G. R. Shen, J. Yang, C. K. Dong, H. Liu, F. X. Ye and X. W. Du, *Adv. Funct. Mater.*, 2022, **32**, 1–8.

- (S37) J. Huang, C. Jian, Q. Cai, W. Hong and W. Liu, *J. Mater. Chem. A*, 2022, **10**, 10990–10997.
- (S38) S. Parvin, V. Hazra, A. G. Francis, S. K. Pati and S. Bhattacharyya, *Inorg. Chem.*, 2021, **60**, 6911–6921.
- (S39) Z. Li, R. Wu, Y. Wen, F. K. Chiang, X. J. Liu, J. Wang, R. Li, H. Wang, Y. Wu, S. Jiang, X. Wang and Z. P. Lu, *Nanoscale*, 2022, **14**, 325–332.
- (S40) R. Li, B. Chu, J. Liu, F. Wang, Z. Chen, Q. Pang, B. Li, M. Fan and L. Dong, *ACS Sustain. Chem. Eng.*, 2022, **10**, 12262-12270.
